# Supplementary material
Source: PubMed Central journal article supplement (PMC3024684)
Supplement: 1006669107_pnas.201006669SI.pdf [file 1006669107_pnas.201006669SI.pdf]

# Supporting Information

Somorjai and Li 10.1073/pnas.1006669107

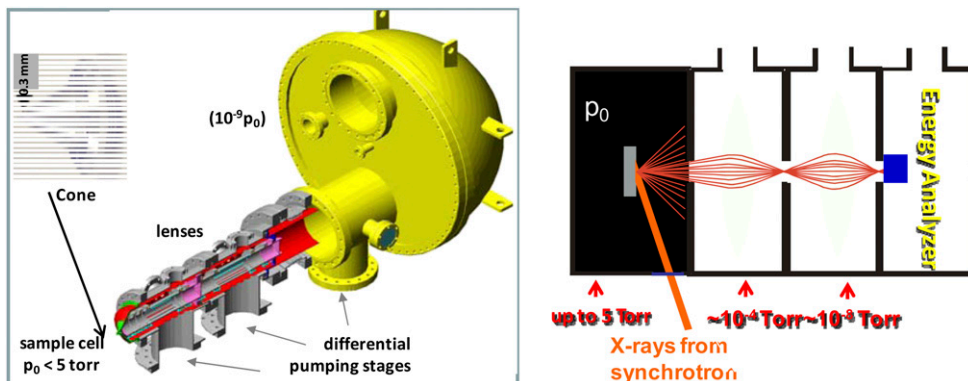

Fig. S1. Scheme of the photoelectron detector used in AP-XPS technique.

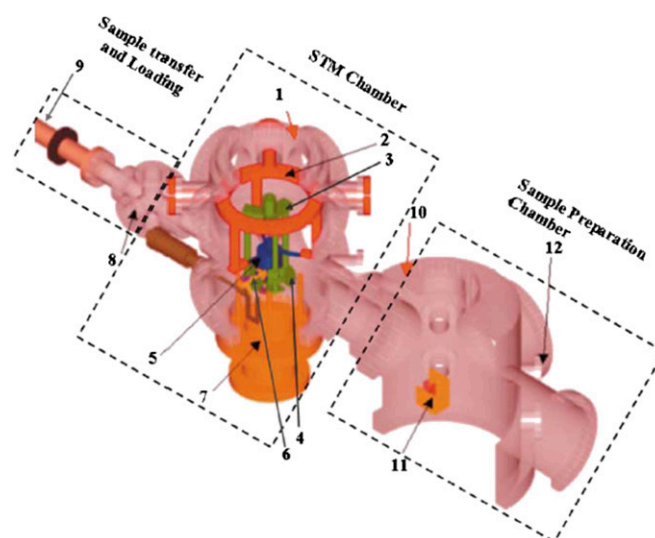

Fig. S2. Scheme of a recent designed HP-STM experiment system: 1, view window; 2, mounting framework; 3, docking scaffold; 4, docking disk; 5, high pressure reactor (STM body housed within); 6, bayonet seal; 7, guide rod of docking scaffold; 8, sample/tip load-lock system; 9, transfer rod; 10, gate valve; 11, four-finger sample stage; 12, sputtering ion gun.

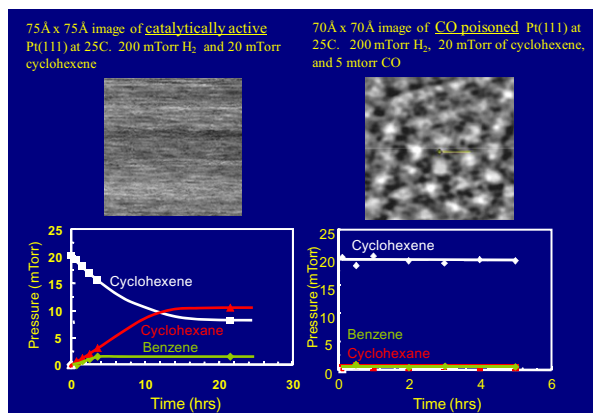

Fig. S3. The correlation between the mobility of adsorbates and the reaction turnover rate during the hydrogenation/dehydrogenation of cyclohexene over the Pt(111) surface.
